# Supplementary material for: Quantitative Analysis of Differential Proteome Expression in Epithelial-to-Mesenchymal Transition of Bladder Epithelial Cells Using SILAC Method
Source: MDPI journal article supplement (doi:10.3390/molecules21010084), 2016-01-15
Supplement: s1 [file s1]

# Supplementary Data I: Quantitative Analysis of Differential Proteome Expression in Epithelial-to-Mesenchymal Transition of Bladder Epithelial Cells Using SILAC Method

Ganglong Yang <sup>1</sup>, Wei Lu <sup>1</sup>, Di Yu <sup>2</sup>, Chengwen Sun <sup>3</sup>, Jia Guo <sup>1</sup>, Zheng Li <sup>4</sup> and Feng Guan <sup>1,\*</sup>

**Table S1.** Differential expression of proteins in EMT of HCV29 and KK47 with at least one z-score value (H/L) >1.960  $\sigma$  in two biological replicates.

| Swiss-Prot    | Protein Name                                             | Gene Name | EMT of HCV29 |                       |         | EMT of KK47 |                       |         |
|---------------|----------------------------------------------------------|-----------|--------------|-----------------------|---------|-------------|-----------------------|---------|
|               |                                                          |           | H/L Mean     | log <sub>2</sub> Mean | Z-Score | H/L Mean    | log <sub>2</sub> Mean | Z-Score |
| EBP_HUMAN     | 3-beta-hydroxysteroid-delta(8)                           | EBP       | 37.54        | 5.23                  | 4.14    | 1.00        | 0.00                  | 0.02    |
| PADI2_HUMAN * | Protein-arginine deiminase type-2                        | PADI2     | 21.42        | 4.40                  | 3.51    | 0.85        | -0.23                 | -1.09   |
| CBS_HUMAN     | Cystathionine beta-synthase                              | CBS       | 33.13        | 4.22                  | 3.37    | 0.97        | -0.05                 | -0.20   |
| UBS3B_HUMAN * | Ubiquitin-associated and SH3 domain-containing protein B | UBASH3B   | 17.63        | 4.14                  | 3.30    | 1.03        | 0.04                  | 0.23    |
| Q5JB52_HUMAN  | Heterogeneous nuclear ribonucleoprotein L-like           | HNRPLL    | 17.58        | 4.14                  | 3.30    | 1.17        | 0.23                  | 1.10    |
| 1A36_HUMAN    | HLA class I histocompatibility antigen                   | HLA-A     | 17.34        | 4.12                  | 3.28    | 1.13        | 0.17                  | 0.85    |
| MT2_HUMAN     | Metallothionein-2                                        | MT2A      | 11.15        | 3.43                  | 2.75    | 1.11        | 0.16                  | 0.77    |
| H0Y4M8_HUMAN  | Zinc finger protein 185                                  | ZNF185    | 10.78        | 3.35                  | 2.69    | 1.26        | 0.33                  | 1.60    |
| ASSY_HUMAN *  | Argininosuccinate synthase                               | ASS1      | 10.13        | 3.34                  | 2.69    | 1.20        | 0.26                  | 1.25    |
| IMUP_HUMAN    | Immortalization upregulated protein                      | IMUP      | 10.35        | 3.27                  | 2.63    | 0.86        | -0.22                 | -1.03   |
| EF1A2_HUMAN * | Elongation factor 1-alpha 2                              | EEF1A2    | 9.29         | 3.20                  | 2.58    | 1.14        | 0.18                  | 0.90    |
| RBM27_HUMAN   | RNA-binding protein 27                                   | RBM27     | 9.38         | 3.18                  | 2.57    | 0.93        | -0.11                 | -0.50   |
| 1433S_HUMAN * | 14-3-3 protein sigma                                     | SFN       | 9.28         | 3.17                  | 2.56    | 0.97        | -0.04                 | -0.18   |
| CLMN_HUMAN    | Calmin                                                   | CLMN      | 8.73         | 3.12                  | 2.52    | 0.93        | -0.10                 | -0.45   |
| MTAP_HUMAN *  | S-methyl-5-thioadenosine phosphorylase                   | MTAP      | 8.86         | 3.11                  | 2.51    | 1.00        | -0.01                 | -0.01   |
| IF2B1_HUMAN   | Insulin-like growth factor 2 mRNA-binding protein 1      | IGF2BP1   | 8.83         | 3.10                  | 2.50    | 1.01        | 0.02                  | 0.11    |
| J3KT73_HUMAN  | 60S ribosomal protein L38                                | RPL38     | 12.87        | 3.09                  | 2.49    | 0.98        | -0.03                 | -0.14   |
| SPY4_HUMAN    | Protein sprouty homolog 4                                | SPRY4     | 8.52         | 3.08                  | 2.49    | 0.98        | -0.03                 | -0.10   |
| KS6A5_HUMAN   | Ribosomal protein S6 kinase                              | RPS6KA5   | 8.36         | 3.04                  | 2.46    | 0.83        | -0.26                 | -1.23   |
| ARRB2_HUMAN   | Beta-arrestin-2                                          | ARRB2     | 8.19         | 3.03                  | 2.45    | 0.99        | -0.02                 | -0.07   |
| L2GL2_HUMAN   | Lethal(2) giant larvae protein homolog 2                 | LLGL2     | 8.10         | 3.00                  | 2.42    | 1.02        | 0.02                  | 0.10    |
| SSRP1_HUMAN   | FACT complex subunit SSRP1                               | SSRP1     | 7.28         | 2.86                  | 2.32    | 0.95        | -0.08                 | -0.33   |
| E9PES6_HUMAN  | High mobility group protein B3                           | HMGB3     | 7.06         | 2.82                  | 2.29    | 1.11        | 0.15                  | 0.74    |

Table S1. Cont.

| Swiss-Prot     | Protein Name                                                                     | Gene Name | EMT of HCV29 |                       |         | EMT of KK47 |                       |         |
|----------------|----------------------------------------------------------------------------------|-----------|--------------|-----------------------|---------|-------------|-----------------------|---------|
|                |                                                                                  |           | H/L Mean     | log <sub>2</sub> Mean | Z-Score | H/L Mean    | log <sub>2</sub> Mean | Z-Score |
| SMHD1_HUMAN    | Structural maintenance of chromosomes flexible hinge domain-containing protein 1 | SMCHD1    | 6.98         | 2.76                  | 2.24    | 1.00        | −0.01                 | −0.01   |
| G3V5B2_HUMAN   | Legumain                                                                         | LGMN      | 6.73         | 2.74                  | 2.23    | 1.01        | 0.02                  | 0.10    |
| C9JXC1_HUMAN   | Ribonucleoside-diphosphate reductase subunit M2                                  | RRM2      | 6.97         | 2.74                  | 2.22    | 0.99        | −0.03                 | −0.09   |
| NO66_HUMAN     | Bifunctional lysine-specific demethylase and histidyl-hydroxylase NO66           | NO66      | 6.61         | 2.68                  | 2.18    | 0.90        | −0.16                 | −0.72   |
| B0S8I7_HUMAN * | L antigen family member 3                                                        | LAGE3     | 6.37         | 2.67                  | 2.17    | 0.99        | −0.01                 | −0.01   |
| NPM3_HUMAN *   | Nucleoplasmin-3                                                                  | NPM3      | 6.02         | 2.59                  | 2.11    | 0.94        | −0.09                 | −0.41   |
| P20D2_HUMAN    | Peptidase M20 domain-containing protein 2                                        | PM20D2    | 6.09         | 2.58                  | 2.10    | 0.83        | −0.28                 | −1.29   |
| TRM61_HUMAN    | tRNA (adenine(58)-N(1))-methyltransferase catalytic subunit TRMT61A              | TRMT61A   | 6.06         | 2.55                  | 2.08    | 0.93        | −0.11                 | −0.49   |
| TRM6_HUMAN     | tRNA (adenine(58)-N(1))-methyltransferase non-catalytic subunit TRM6             | TRMT6     | 5.92         | 2.55                  | 2.08    | 0.93        | −0.11                 | −0.49   |
| ITPA_HUMAN     | Inosine triphosphate pyrophosphatase                                             | ITPA      | 5.83         | 2.54                  | 2.07    | 0.91        | −0.14                 | −0.65   |
| SYDM_HUMAN     | Aspartate-tRNA ligase, mitochondrial                                             | DARS2     | 6.02         | 2.54                  | 2.07    | 0.99        | −0.01                 | −0.04   |
| DCTP1_HUMAN    | dCTP pyrophosphatase 1                                                           | DCTPP1    | 5.82         | 2.54                  | 2.07    | 1.01        | 0.02                  | 0.12    |
| H7BYU9_HUMAN   | UPF0687 protein C20orf27                                                         | C20orf27  | 5.66         | 2.49                  | 2.03    | 0.99        | −0.02                 | −0.06   |
| PYRG1_HUMAN    | CTP synthase 1                                                                   | CTPS1     | 5.35         | 2.42                  | 1.97    | 1.49        | 0.58                  | 2.80    |
| F5GZ28_HUMAN   | DNA ligase; DNA ligase 1                                                         | LIG1      | 5.35         | 2.41                  | 1.97    | 1.05        | 0.07                  | 0.38    |
| DIAP3_HUMAN    | Protein diaphanous homolog 3                                                     | DIAPH3    | 5.30         | 2.40                  | 1.96    | 1.16        | 0.21                  | 1.03    |
| 1C07_HUMAN #   | HLA class I histocompatibility antigen                                           | HLA-C     | 0.02         | −6.19                 | −4.66   | 1.06        | 0.07                  | 0.38    |
| CATB_HUMAN #   | Cathepsin B                                                                      | CTSB      | 0.05         | −4.34                 | −3.23   | 1.09        | 0.11                  | 0.53    |
| ALDR_HUMAN #   | Aldose reductase                                                                 | AKR1B1    | 0.06         | −4.13                 | −3.07   | 1.02        | 0.03                  | 0.16    |
| CKAP4_HUMAN #  | Cytoskeleton-associated protein 4                                                | CKAP4     | 0.09         | −3.47                 | −2.56   | 0.95        | −0.08                 | −0.36   |
| MGLL_HUMAN     | Monoglyceride lipase                                                             | MGLL      | 0.09         | −3.44                 | −2.54   | 0.91        | −0.13                 | −0.60   |
| SCRB2_HUMAN    | Lysosome membrane protein 2                                                      | SCARB2    | 0.10         | −3.40                 | −2.51   | 1.00        | −0.02                 | −0.07   |
| DPYL3_HUMAN #  | Dihydropyrimidinase-related protein 3                                            | DPYSL3    | 0.14         | −3.17                 | −2.33   | 0.92        | −0.12                 | −0.56   |
| ANXA1_HUMAN    | Annexin A1                                                                       | ANXA1     | 0.12         | −3.06                 | −2.24   | 0.86        | −0.21                 | −0.98   |
| A8MWK3_HUMAN   | Cadherin-2                                                                       | CDH2      | 0.13         | −3.00                 | −2.20   | 1.49        | 0.57                  | 2.77    |
| MYO1B_HUMAN    | Unconventional myosin-Ib                                                         | MYO1B     | 0.13         | −2.96                 | −2.17   | 0.86        | −0.23                 | −1.06   |
| TBD2A_HUMAN    | TBC1 domain family member 2A                                                     | TBC1D2    | 0.17         | −2.89                 | −2.12   | 0.89        | −0.18                 | −0.81   |
| SERPH_HUMAN    | Serpin H1                                                                        | SERPINH1  | 0.14         | −2.86                 | −2.09   | 1.04        | 0.06                  | 0.31    |
| BIN1_HUMAN #   | Myc box-dependent-interacting protein 1                                          | BIN1      | 0.14         | −2.85                 | −2.08   | 0.83        | −0.26                 | −1.23   |
| VIME_HUMAN     | Vimentin                                                                         | VIM       | 0.14         | −2.82                 | −2.06   | 0.94        | −0.11                 | −0.49   |
| S10A6_HUMAN    | Protein S100-A6                                                                  | S100A6    | 0.15         | −2.70                 | −1.97   | 1.51        | 0.58                  | 2.82    |
| STAT1_HUMAN    | Signal transducer and activator of transcription 1-alpha/beta                    | STAT1     | 0.16         | −2.70                 | −1.96   | 1.05        | 0.07                  | 0.37    |
| NMES1_HUMAN    | Normal mucosa of esophagus-specific gene 1 protein                               | NMES1     | 2.02         | 1.00                  | 0.88    | 2.42        | 1.27                  | 6.09    |
| EPHA2_HUMAN    | Ephrin type-A receptor 2                                                         | EPHA2     | 1.20         | 0.25                  | 0.31    | 0.45        | −1.14                 | −5.43   |
| H7C4E5_HUMAN   | Cytochrome c oxidase copper chaperone                                            | COX17     | 2.91         | 1.52                  | 1.28    | 2.16        | 1.09                  | 5.24    |
| PLEK2_HUMAN *  | Pleckstrin-2                                                                     | PLEK2     | 5.32         | 2.41                  | 1.97    | 2.81        | 1.49                  | 7.15    |

Table S1. Cont.

| Swiss-Prot   | Protein Name                          | Gene Name | EMT of HCV29 |                       |         | EMT of KK47 |                       |         |
|--------------|---------------------------------------|-----------|--------------|-----------------------|---------|-------------|-----------------------|---------|
|              |                                       |           | H/L Mean     | log <sub>2</sub> Mean | Z-Score | H/L Mean    | log <sub>2</sub> Mean | Z-Score |
| Q5QPE4_HUMAN | Sorting nexin-5                       | SNX5      | 4.59         | 2.20                  | 1.81    | 2.45        | 1.23                  | 5.92    |
| K1C10_HUMAN  | Keratin, type I cytoskeletal 10       | KRT10     | 0.26         | −1.96                 | −1.40   | 0.17        | −2.56                 | −12.24  |
| K2C1_HUMAN   | Keratin, type II cytoskeletal 1       | KRT1      | 0.52         | −1.43                 | −0.99   | 0.24        | −2.19                 | −10.45  |
| K7EQQ3_HUMAN | Keratin, type I cytoskeletal 9        | KRT9      | 0.07         | −3.99                 | −2.96   | 0.21        | −2.29                 | −10.93  |
| PAI2_HUMAN   | Plasminogen activator inhibitor 2     | SERPINB2  | 0.11         | −3.27                 | −2.41   | 0.23        | −2.20                 | −10.49  |
| FHL2_HUMAN # | Four and a half LIM domains protein 2 | FHL2      | 0.05         | −4.46                 | −3.33   | 2.02        | 1.02                  | 4.88    |
| HM13_HUMAN   | Minor histocompatibility antigen H13  | HM13      | 0.29         | −1.83                 | −1.30   | 3.57        | 1.79                  | 8.57    |
| ITAV_HUMAN   | Integrin alpha-V                      | ITGAV     | 0.39         | −1.46                 | −1.02   | 2.16        | 1.10                  | 5.29    |

\* Proteins showing upregulated expression in BC cells and EMT of HCV29/KK47; # Proteins showing downregulated expression in BC cells and EMT of HCV29/KK47.

Table S2. The GO data of the proteins in EMT of HCV29 and KK47.

| Molecular_Function                            | 25408783 | Percentage | Cellular_Component             | 13892518 | Percentage | Biological_Process               | 26697308 | Percentage |
|-----------------------------------------------|----------|------------|--------------------------------|----------|------------|----------------------------------|----------|------------|
| Catalytic activity                            | 17325358 | 44.27%     | Cell                           | 9444003  | 21.94%     | Metabolic process                | 21019512 | 30.37%     |
| Binding                                       | 14147991 | 36.15%     | Cell part                      | 9248594  | 21.49%     | Cellular process                 | 16858784 | 24.36%     |
| Transporter activity                          | 2818072  | 7.20%      | Membrane                       | 7132261  | 16.57%     | Single-organism process          | 13106784 | 18.94%     |
| Nucleic acid binding                          | 1192117  | 3.05%      | Membrane part                  | 5228028  | 12.15%     | Localization                     | 4840884  | 6.99%      |
| transcription factor activity                 | 1145892  | 2.93%      | Organelle                      | 3732192  | 8.67%      | Biological regulation            | 4382130  | 6.33%      |
| Structural molecule activity                  | 981781   | 2.51%      | Macromolecular complex         | 2332064  | 5.42%      | Response to stimulus             | 2603498  | 3.76%      |
| Electron carrier activity                     | 792386   | 2.02%      | Organelle part                 | 1717532  | 3.99%      | Cellular component               | 1835449  | 2.65%      |
| Molecular transducer activity                 | 191975   | 0.49%      | Virion                         | 1056179  | 2.45%      | organization or biogenesis       | 1256404  | 1.82%      |
| Molecular function regulator                  | 163669   | 0.42%      | Virion part                    | 951609   | 2.21%      | Signaling                        | 1145260  | 1.65%      |
| Protein binding transcription factor activity | 160684   | 0.41%      | Other organism                 | 637466   | 1.48%      | Multi-organism process           | 618986   | 0.89%      |
| Antioxidant activity                          | 146128   | 0.37%      | Other organism part            | 637465   | 1.48%      | Locomotion                       | 453915   | 0.66%      |
| Enzyme regulator activity                     | 38653    | 0.10%      | Extracellular region           | 329430   | 0.77%      | Biological adhesion              | 356047   | 0.51%      |
| Guanyl-nucleotide exchange factor activity    | 10769    | 0.03%      | Extracellular matrix           | 242080   | 0.56%      | Multicellular organismal process | 340209   | 0.49%      |
| Nutrient reservoir activity                   | 8873     | 0.02%      | Membrane-enclosed lumen        | 160174   | 0.37%      | Developmental process            | 182261   | 0.26%      |
| Channel regulator activity                    | 1894     | 0.00%      | Extracellular region part      | 53256    | 0.12%      | Immune system process            | 84740    | 0.12%      |
| Translation regulator activity                | 1260     | 0.00%      | Cell junction                  | 41673    | 0.10%      | Reproduction                     | 65167    | 0.09%      |
| D-alanyl carrier activity                     | 1256     | 0.00%      | Extracellular matrix           | 28447    | 0.07%      | Reproductive process             | 27656    | 0.04%      |
| Metallochaperone activity                     | 1143     | 0.00%      | Synapse                        | 25684    | 0.06%      | Growth                           | 19580    | 0.03%      |
| Protein tag                                   | 1066     | 0.00%      | Nucleoid                       | 20728    | 0.05%      | Behavior                         | 9606     | 0.01%      |
| Receptor regulator activity                   | 709      | 0.00%      | Synapse part                   | 10304    | 0.02%      | Rhythmic process                 | 5309     | 0.01%      |
| Chemoattractant activity                      | 306      | 0.00%      | Collagen trimer                | 6066     | 0.01%      | Cell killing                     | 2388     | 0.00%      |
| Chemorepellent activity                       | 123      | 0.00%      | Plasmodesma                    | 4166     | 0.01%      | Hormone secretion                | 1086     | 0.00%      |
| Morphogen activity                            |          |            | Extracellular matrix component | 495      | 0.00%      | Cell aggregation                 | 76       | 0.00%      |
|                                               |          |            | Viral occlusion body           |          |            | Biological phase                 |          |            |

**Table S3.** The IPA data in the EMT of HCV29 cells.

| ID | Molecules in Network                                                                                                                                                                                    | Score | Focus Molecules | Top Diseases and Functions                                                                                     |
|----|---------------------------------------------------------------------------------------------------------------------------------------------------------------------------------------------------------|-------|-----------------|----------------------------------------------------------------------------------------------------------------|
| 1  | AKR1C3,ANXA1,BAD,BIN1,CCND2,CD274,COL18A1,CTSD,FN1,GLRX,HCLS1,HK1,IFNAR1,IFNGR1,IL2,IL13,IL10RA,IL4I1,ITGB2,MMP14,MYC,NPC1,NPC2,PRDM1,PTPN1,SATB1,SH3KBP1,SLAMF1,STAT1,STAT3,STAT4,SYK,THPO,TYK2,UNC13D | 14    | 3               | Cellular Development, Cellular Growth and Proliferation, Hematological System Development and Function         |
| 2  | AKT1,ARRB2,ATP2B1,CCL5,CD4,CD28,CD40,CSF2,CXCL10,GBP1,HLA-B,HLA-C,IFNA1/IFNA13,IFNAR2,IFNG,IL6,IL10,IL18,IL1B,ISG15,KIR3DL1,MME,NPM3,OAS2,OSM,PLG,PSMB10,PSME2,RRM2,SERPINB2,TLR3,TLR4,TNF,TREM1,UBA7   | 12    | 3               | Dermatological Diseases and Conditions, Inflammatory Response, Cell-To-Cell Signaling and Interaction          |
| 3  | ABCC3,AKR1B1,AKT1,B2M,CCL3,CCL4,CD1D,CDC42,CEBPB,CREB1,CSF1,CSF3,CTSB,CXCL8,ENPP1,FABP5,IL6,IL27,IL32,IL1B,IL6R,LCP1,LGALS3,LGALS3BP,MT2A,MX1,NPC1,NPC2,OSM,PRKCZ,RAC1,RELA,RORC,RP56KA5,TLR4           | 12    | 2               | Cell Death and Survival, Cell Morphology, Cellular Development                                                 |
| 4  | AR,CAPG,CAV1,CCL2,CCL5,CDKN1A,CDKN2A,CKAP4,COL6A3,CXCR4,DCTPP1,DIAPH3,ERG,FBN1,IFNG,IL6,IL1B,ITPA,MMP1,MMP3,MMP9,MMP25,MYL9,NOS3,RELA,SERPINH1,SMAD3,SP1,SPARC,SRF,TERT,TGFB1,TNF,TP53,VIM              | 11    | 3               | Cellular Development, Cellular Growth and Proliferation, Skeletal and Muscular System Development and Function |
| 5  | CASP14,OCIAD2                                                                                                                                                                                           | 1     | 0               | Cell-To-Cell Signaling and Interaction, Tissue Development, Cell Morphology                                    |
| 6  | LIPE,PTRF                                                                                                                                                                                               | 1     | 1               | Carbohydrate Metabolism, Molecular Transport, Small Molecule Biochemistry                                      |
| 7  | HIF1A,PLOD2                                                                                                                                                                                             | 1     | 1               | Organismal Injury and Abnormalities, Connective Tissue Disorders, Hereditary Disorder                          |
| 8  | NPTN,NRXN1                                                                                                                                                                                              | 1     | 0               | Developmental Disorder, Hereditary Disorder, Neurological Disease                                              |
| 9  | GLI1,KRT19                                                                                                                                                                                              | 1     | 0               | Cancer, Cell Death and Survival, Embryonic Development                                                         |
| 10 | NANOG,S100A6                                                                                                                                                                                            | 1     | 1               | Cell Cycle, Embryonic Development, Cellular Growth and Proliferation                                           |
| 11 | A2M,DLG4,GRIN2A,LRP1,MEOX2,PLIN2                                                                                                                                                                        | 1     | 0               | Cancer, Cell Death and Survival, Cell-To-Cell Signaling and Interaction                                        |

**Table S4.** The IPA data in the EMT of KK47 cells.

| ID | Molecules in Network                                                                                                                                                                                       | Score | Focus Molecules | Top Diseases and Functions                                                                 |
|----|------------------------------------------------------------------------------------------------------------------------------------------------------------------------------------------------------------|-------|-----------------|--------------------------------------------------------------------------------------------|
| 1  | AKT2,ALDH1A3,BCL3,CAMP,CCND2,CD163,COL1A2,EHD1,EHF,F2,FLNA,HMOX1,ITGA1,ITGA2,ITGA5,ITGAV,ITGB1,ITGB5,LAMC2,MAP3K7,MMP1,MMP14,NEDD9,NFE2L2,PRDM1,SCD,SH3KBP1,SQSTM1,TGFB1,TGFB2,TGM2,TJP2,TNF,VEGFC,ZFP36L1 | 16    | 12              | Cancer, Cellular Movement, Tumor Morphology                                                |
| 2  | ANG,CCL2,CCL5,CXCL8,CXCR4,ERG,FLNB,FOS,GAPDH,HPCAL1,IFIT2,IFNG,IL6,IL1B,ILK,KRT1,KRT10,LIMS1,LMNA,MAP3K8,MAPK1,MMP19,NCOR2,NEDD4L,OASL,PARVA,PPAP2B,RB1,SERPINB2,TERT,TGFB1,TLR3,TNF,TP63,TREM1            | 14    | 11              | Cell-To-Cell Signaling and Interaction, Tissue Development, Cell Death and Survival        |
| 3  | SATB1,SUN2                                                                                                                                                                                                 | 2     | 1               | Cellular Assembly and Organization, Cellular Function and Maintenance, Molecular Transport |
| 4  | MMP25,TPM3                                                                                                                                                                                                 | 2     | 1               | Developmental Disorder, Hereditary Disorder, Skeletal and Muscular Disorders               |
| 5  | HIF1A,P4HA2                                                                                                                                                                                                | 2     | 1               | Cancer, Cardiovascular System Development and Function, Cell Cycle                         |
| 6  | NANOG,S100A6                                                                                                                                                                                               | 2     | 1               | Cell Cycle, Embryonic Development, Cellular Growth and Proliferation                       |
| 7  | CDKN2A,GATA4,MYOCD,TBX5,TPM1                                                                                                                                                                               | 1     | 1               | Cellular Development, Tissue Development, Cellular Growth and Proliferation                |
